Evidence that an HDAC2-targeted ASO persistently upregulates cortical acetylcholine  
and dopamine signaling via a CREB | Gs positive feedback loop

**Author:**

Teresa H. Sanders, PhD  
Molecular, Cellular, and Developmental Biology  
University of Colorado Boulder  
Gold Biosciences, A445  
Boulder CO 80309  
[sanderslab.org](http://sanderslab.org)  
phone: 770-862-2590  
Correspondence should be addressed to THS at  
[teresa.sanders@colorado.edu](mailto:teresa.sanders@colorado.edu)

Rat experiments and RNA-seq were performed  
at Vanderbilt University  
Nashville, TN, USA

**Figures: 6 + 1 supplemental**

**Abstract: 199 words**

**Introduction: 649 words (2 pages)**

**Discussion: 867 words**

1

2

3 **Abbreviated title:** HDAC2i increases ACh & DA via CREB/Gs feedback

4

5

## 6 **Abstract**

7 Epigenetic modulation of neural circuits facilitates learning and memory. Here, we examined  
8 specific inhibition of histone deacetylase 2 (*HDAC2*) expression in rats receiving a single  
9 intracerebroventricular injection of *HDAC2*-targeted anti-sense oligonucleotides (ASOs) one  
10 month prior to cognitive testing. The *HDAC2* ASO-injected rats displayed increased novelty  
11 preference, decreased cortical and hippocampal *HDAC2* mRNA and protein, and upregulated  
12 gene expression that persisted 1-month post-injection. Cortical RNA-seq revealed strongly  
13 increased transcription of a subset of cyclic adenosine monophosphate (cAMP)-response  
14 element binding (*CREB*) genes known to influence synaptic plasticity, along with dopamine  
15 (*DRD1*, *DRD2*) and adenosine (*ADORA2A*) G-protein-coupled receptors (GPCRs). Our analysis  
16 identified evidence of a positive-feedback loop that amplified expression of CREB-regulated Gs  
17 GPCRs and genes in cAMP/Gs/Gi signaling pathways. Additionally, we found differential  
18 expression of enzymes that shift neurotransmitter biosynthesis away from norepinephrine and  
19 toward dopamine and acetylcholine (DBH, CHAT). We also observed increased expression of  
20 genes important for neurotransmitter packaging (*SV2C*, *VMAT*) and release (*SYT9*). The data  
21 indicate that persistent inhibition of *HDAC2* expression enables long-lived enhancement of  
22 aspects of cognition through increased cortical transcription of a subset of CREB-regulated genes  
23 amplified by a positive-feedback mechanism that increases synaptic plasticity and shifts  
24 neurotransmitter balance toward increased dopaminergic and cholinergic signaling.

25

## 26 Introduction

27 Long-term memory requires transcriptional changes that are facilitated by epigenetic  
28 modulation of DNA accessibility (Korzus et al., 2004; Miller et al., 2008). To promote the  
29 necessary transcriptional changes, DNA that is tightly wrapped around histones and wound into  
30 heterochromatin must be made more accessible. Acetylation of lysines within the N-terminal tail  
31 of histones relaxes chromatin compaction and facilitates transcription (Zentner et al., 2013).  
32 Accordingly, studies have shown that histone acetylation and deacetylation are fundamental  
33 epigenetic modulations linked to cognition (Alarcon et al., 2004; Korzus et al., 2004; Miller et al.,  
34 2008; Sanders et al., 2019). Enzymes known as histone acetyltransferases (HATs), such as those  
35 found in CREB-binding proteins (CBPs), can activate transcription by transferring acetyl groups  
36 to histones. On the other hand, histone deacetylase enzymes, or HDACs, facilitate chromatin  
37 compaction by removing acetyl groups, thereby repressing transcription.

38 Decreasing acetylation by inhibiting HATs impairs long-term memory (Alarcon et al. 2004;  
39 Wood et al. 2005), while increasing acetylation by inhibiting HDACs has been shown to enhance  
40 hippocampal long-term potentiation (Vecsey et al., 2007), memory (Levenson et al. 2004; Hawk  
41 et al. 2011; Itzhak et al., 2013), neuronal development (Cho and Cavalli, 2014), and cognition  
42 (Penney et al., 2014). In mice, loss of one of the eleven HDAC isoforms, HDAC2, has also been  
43 shown to improve performance on hippocampal and prefrontal-cortex dependent learning tasks  
44 (Guan et al. 2009; Morris et al. 2013). *HDAC2* has been found to be overexpressed in Alzheimer's  
45 disease (AD) in humans and rodents, and its inhibition has been shown to reduce signs of AD in  
46 a mouse model (Graff et al. 2012). Accordingly, specific inhibition of *HDAC2* has been a goal of  
47 pharmacological design (Wang et al. 2005; Choubey and Jeyakanthan 2018).

48 Antisense oligonucleotides (ASOs) are clinically useful for treating disease (Alter et al., 2006;  
49 Downes et al., 2006; DeVos et al., 2013; Stein and Castanotto 2017) since they provide specificity  
50 through base pairing with a target messenger RNA (mRNA). The ASOs used in this study target  
51 *HDAC2* mRNA. Previously, these ASOs have been shown to enhance memory in wild-type mice

52 in object location memory tests and to rescue impaired memory in a mouse model of autism  
53 (Kennedy et al. 2016). In mice, a single *HDAC2* ASO injection reduced *HDAC2* expression for  
54 over 4 months, and increased object location memory for 8 weeks (Poplawski et al., 2020). ASOs  
55 targeting other mRNAs have been shown to reduce expression of their target genes in the central  
56 nervous system for months after delivery of the drug (Kordasiewicz et al. 2012; Southwell et al.,  
57 2014; Meng et al. 2015). ASOs can act through recruitment of RNaseH1 to the RNA/ASO hybrid  
58 and subsequent degradation of the RNA (Wu et al. 2004) or by modulation of splicing (Merkhofer  
59 et al. 2014). Recent studies have also shown evidence that ASOs may interfere directly with  
60 transcription of the target gene (Poplawski et al., 2020).

61 Although HDAC inhibitors have been shown to enhance memory processes by activation of  
62 genes regulated by the CREB: CBP transcriptional complex (Vecsey et al., 2007; Guan et al.,  
63 2009), the specific mechanisms linking long-term ASO inhibition of *HDAC2*, cortical plasticity, and  
64 cognitive enhancements are poorly understood. Putative mechanisms include those that  
65 modulate norepinephrine, dopamine, and acetylcholine since these neurotransmitters are known  
66 to play important roles in learning and memory (Rasmusson et al., 2000; Myhrer et al., 2003;  
67 Berridge and Waterhouse, 2003; Sara, 2009) and are pharmacologic targets for  
68 neurodegenerative disorders such as AD (Hardy et al., 1985; Chalermphanupap et al., 2013) and  
69 Parkinson's disease (Cools et al., 2001; Mattay et al., 2002; Verschuur et al., 2019). Evidence for  
70 the importance of their role in the brain is emphasized by recent projection-tracing studies that  
71 have revealed the widespread nature of neurotransmitter-releasing neuronal circuits (Bjorklund  
72 and Dunnett, 2007; Chandler et al., 2014; Aston-Jones and Waterhouse, 2016). Here, we  
73 investigate gene expression alterations following a multi-day novelty preference task to discover  
74 that acetylcholine and catecholamine neurotransmitter pathway modulation enabled by a CREB |  
75 Gs signaling positive feedback loop, along with upregulated expression of synaptic plasticity,  
76 cellular differentiation, and forebrain development genes, underlies persistent improved cognition  
77 in rats injected with *HDAC2* ASOs.

## 78 **Results**

### 79 **ASO-injected rats display long-lived reductions in *HDAC2* mRNA and protein**

80 One month after intracerebroventricular (ICV) injection of *HDAC2* ASOs, protein (Western Blot)  
81 and transcripts (qPCR) from cortical and hippocampal tissues were quantified (Fig. 1). Since  
82 these initial results showed *HDAC2* mRNA and protein were reduced more after ASO1 injections  
83 compared to ASO2 (Fig. 1C), experimentation and analysis proceeded with ASO1. Rats receiving  
84 *HDAC2* ASOs had significantly reduced *HDAC2* expression compared to rats receiving ICV  
85 injections of saline or non-targeting ASO (Fig. 1C, ASO1 cortex:  $\log_2(\text{fold-change}) = -1.62, -1.40,$   
86  $p < 0.01,$  mRNA and protein respectively, ASO1 hippocampus:  $\log_2(\text{fold-change}) = -2.33, -1.85,$   
87  $p < 0.01,$  mRNA and protein respectively).

### 88 ***HDAC2* ASO1 injection improves performance on a novel object recognition task**

89 Novel object recognition tests are commonly used to assess cognition in rodents (Broadbent  
90 et al., 2010; Antunes and Biala, 2012). Previously, we reported that electrical stimulation  
91 administered through implanted cuff electrodes on the left cervical vagus nerve (VNS) in  
92 Sprague-Dawley rats during 30 minutes of object familiarization improved next-day  
93 performance on a novel object recognition task (Sanders et al., 2019). Performance was  
94 assessed by calculating the difference in the amount of time spent interacting with a novel object  
95 ( $t_{o2}$ ) compared to the familiar object ( $t_{o1}$ ), expressed as a fraction of the total time spent interacting  
96 with either object (*novel object preference* =  $\frac{t_{o2} - t_{o1}}{t_{o2} + t_{o1}}$ ). The test was administered for 10 minutes  
97 on 3 consecutive days with new objects rotated in each day (see methods, Fig. 1B). In the current  
98 study, *HDAC2* ASO1 injected Sprague-Dawley rats tested with this paradigm 1-month also  
99 preferred the novel object more strongly than did saline-injected controls ( $\Delta_{\text{novel\_object\_preference}} =$   
100 0.35,  $p = 0.03,$   $n = 6,$  Fig. 1D).

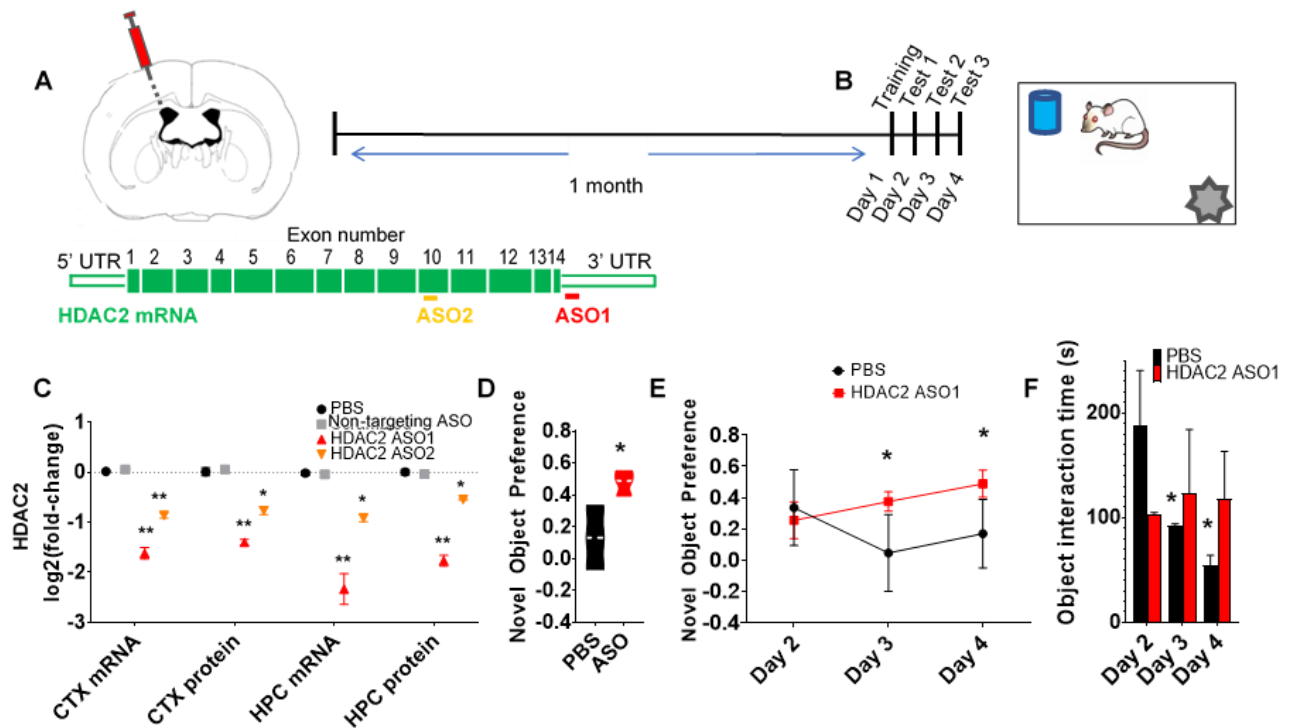

101

**Figure 1. A single injection of *HDAC2* ASO results in enhanced novelty preference and long-lived reduction of *HDAC2* expression.** (A) *HDAC2* ASOs were delivered to rats via intracerebroventricular (ICV) injection, (B) A multi-day novel object preference test was administered one month post-injection, (C) Cortical (CTX) and hippocampal (HPC) tissues were extracted immediately following the last session of behavioral testing to confirm reduced *HDAC2* protein and mRNA in hippocampus and cortex of rats injected with one of two *HDAC2* ASOs (ASO1, ASO2) compared to rats injected with the same volume of PBS or a non-targeting ASO (NTA), (D) Overall novel object preference was increased in ASO1-injected rats compared to rats injected with the same volume of PBS. (E) Novel object preference was similar in PBS and *HDAC2* ASO1 groups for the first day of testing, but ASO1-injected rats showed greater preference for the novel objects on the last two days of testing, (F) PBS-injected controls interacted with the objects less on each consecutive day, while ASO1-injected rats showed the same or greater object interaction on consecutive days. Behavioral tests were performed on rats receiving either PBS or *HDAC2* ASO1 (N = 3 rats per category, later used for RNA-seq analysis), qPCR tests were performed on a separate cohort of rats with N = 3 rats per category (PBS, NTA, *HDAC2* ASO1, *HDAC2* ASO2, N = 12 rats total). SEM error bars, \* p ≤ 0.05, \*\* p ≤ 0.01.

102 Although the overall cumulative novel object preference was significantly increased for *HDAC2*  
 103 ASO-injected rats, there was no difference in novelty preference between sham and treated rats  
 104 on the initial day of testing (Fig. 1E). Investigation of the time spent interacting with objects each  
 105 day further revealed that, for PBS-injected rats, object interaction time was diminished on  
 106 consecutive days of exploration (reduced 51%, 41%, Days 3 and 4 respectively, compared to the  
 107 previous day, p = 0.05). This trend toward decreasing novelty exploration over time has been

108 observed in previous studies (Gaskin et al., 2010; Sanders et al., 2019). However, in the present  
109 study, *HDAC2* ASO1-injected rats interacted with the objects for a similar amount of time each  
110 day (Fig. 1F), with novelty preference peaking on the last test day (Fig. 1E, *novel object*  
111 *preference* = 0.48,  $p = 0.03$ ).

### 112 ***HDAC2* ASO1 injection modulates cortical plasticity gene expression**

113 Analysis of RNA-seq results from hippocampal-adjacent cortex from ASO1-injected rats (Fig. 2)  
114 revealed evidence of gene expression representative of both glial (*OLIG1*, *OLIG2*, *GFAP*) and  
115 neuronal (*MAP2*, *SYP*) cells. However, no significant differences were found between the PBS-  
116 injected control and ASO1-injected rat cell identity transcripts (Fig. 2B). Consistent with the qPCR  
117 results, RNA-seq results showed a significant decrease in cortical *HDAC2* expression in ASO1-  
118 injected rats (Fig. 2D,  $\log_2(\text{fold-change}) = -0.9$ ,  $p = 2.0e-3$ ).

119 Overall, cortical transcripts were increased for 516 genes and decreased for 184 genes ( $p < 0.05$ ).

120 The counts per million (cpm) for genes with the largest increases correlated inversely with the  
121 *HDAC2* cpm (Fig. 2D-E (purple), magnitude of the correlation coefficient,  $\|\rho\| \geq 0.74$ ,  $p < 0.01$ )  
122 and included genes that encode LRRC10B ( $\log_2(\text{FC}) = 4.5$ ,  $p = 5.7e-6$ , leucine rich repeat  
123 containing 10B, localized to the nucleoplasm), SYNDIG1L (4.1,  $p = 5.8e-6$ ), ADORA2A (4.0,  $p$   
124  $= 2.7e-6$ , Adenosine A2A (Gs) receptor, regulates glutamate and dopamine release) (Hack et al.,  
125 2003, Morelli et al., 2007), RGS9 (3.5,  $p = 1.5e-5$ ), DRD2 (3.4,  $p = 7.3e-6$ , D2 dopamine receptor  
126 (Gi-protein coupled), found to be important for cognitive flexibility) (Cameron et al., 2018), RXRG  
127 (3.0,  $p = 0.002$ ), GPR6 (2.9,  $p = 0.0001$ ), SIX3 (2.7,  $p = 0.0009$ ), DRD1 (2.4,  $p = 3.8e-5$ , D1  
128 dopamine receptor (Gs), regulates neuronal growth and development, mediates behavioral  
129 responses and memory, found to be important for cognitive stability) (Cameron et al., 2018),  
130 IQGAP3 (2.1,  $p = 0.0001$ ), ECEL1 (2.1,  $p = 0.0004$ ), CHAT (choline acetyltransferase), PENK  
131 (2.0,  $p = 4.1e-5$ , proenkephalin), and SLC5A7 (1.9,  $p = 0.001$ , choline transporter).

132 Analysis of this top upregulated group of differentially expressed (DE) genes ( $\log_2(\text{FC}) > 1.9$ ,  $p <$   
133  $0.0021$ ) revealed that the majority either contain a CRE domain or respond to enhancers with

134 CRE domains (Figs. 2C, 2E). CRE-binding protein (CREB) transcriptional regulation is important  
135 for neuronal plasticity and long-term memory formation in the brain and has been shown to be  
136 integral in the formation of spatial memory (Silva et al., 1998) while CREB downregulation has  
137 been observed in the pathology of AD (Pugazhenthii et al., 2011).

138 Although increased CRE regulation was clearly associated with the top group of upregulated  
139 genes (Fig. 2D-E), not all these highly upregulated genes contained known CRE domains. Top  
140 DE genes without confirmed CREB-regulation in rats include: *RXRG*, that forms heterodimers  
141 with retinoic acid, thyroid hormone, and vitamin D receptors to facilitate both DNA binding and  
142 transcriptional function on their respective response elements, *IQGAP3*, that expresses a  
143 calmodulin-binding scaffolding protein that plays a role in neuronal morphogenesis such as  
144 neurite outgrowth (Wang et al., 2007), and *SYNDIG1L*, Synapse Differentiation Inducing 1 like  
145 gene (Fig. 2E, gray, although known to be affected by an enhancer regulated by CREB in humans  
146 (Zhang et al., 2005), not yet confirmed to be CREB-regulated in rats (Impey et al., 2004)).

147 The DE genes in this study with potential CREB-regulation were not limited to the top DE genes.  
148 Many with smaller fold-changes also contain promoter CRE domains or interact with enhancers  
149 containing CRE domains. Additionally, not all genes with a CRE domain were upregulated (e.g.  
150 *BDNF* and tyrosine hydroxylase (*TH*) were not upregulated, although both have previously been  
151 found to contain one or more CRE motifs and to respond to associated HAT activity).

### 152 ***HDAC2* inhibition with *HDAC2* ASOs alters expression of key enzymes in catecholamine** 153 **and acetylcholine biosynthesis pathways**

154 The RNA-seq results implicate the effects of increased CREB binding protein HAT activity in the  
155 ASO-injected rats (Fig. 2D-E). However, although increased transcription of *DRD1* and *DRD2*  
156 suggests modulation of dopamine (DA), the overall effect on dopamine signaling cannot be  
157 inferred from the receptor transcriptional changes. To gain further insight into the biochemical  
158 pathway changes induced by *HDAC2* inhibition (*HDAC2i*) → CREB → DA, expression of the  
159 enzymes involved in the dopamine biosynthesis pathway was examined (Fig. 3A). Since



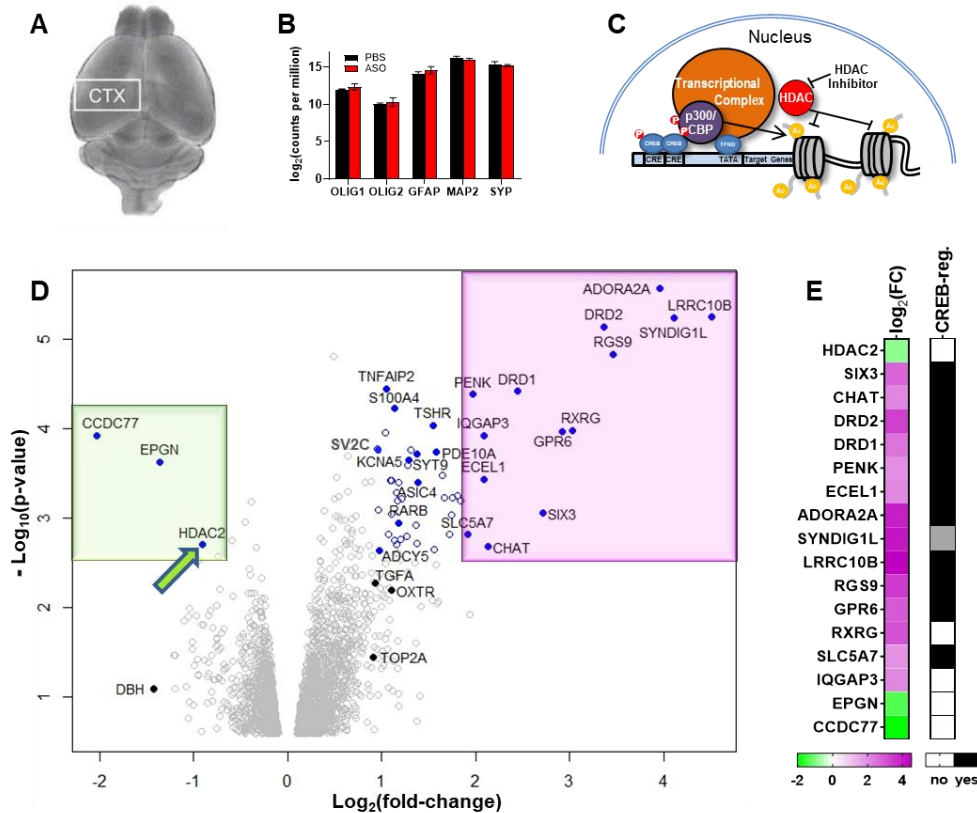

**Figure 2. HDAC2 ASO injection increases cortical transcription.** (A) RNA was extracted from hippocampal-adjacent cortical tissues. (B) Cell identity transcripts were not significantly changed between ASO and PBS cohorts. (C) HDAC inhibitors have previously been found to increase transcription of genes with cAMP-responsive element (CRE) binding domains. (D) RNA-seq confirmed reduced HDAC2 transcripts and increased transcription of many genes including a set of highly upregulated genes (purple region). Blue circles indicate differentially expressed genes with FDR < 0.3. (E) Genes with the most significantly changed transcription, ordered by magnitude of correlation with HDAC2, were primarily genes known to be CREB-regulated. N = 3 rats per category (same cohort used for behavioral testing)

160 acetylcholine is another important neurotransmitter involved in cognition, the enzymes that control  
 161 acetylcholine availability were also examined (Fig. 3B). Expression of the primary acetyl choline  
 162 biosynthesis enzyme, choline acetyltransferase (*CHAT*), correlated strongly with the decrease in  
 163 *HDAC2* expression and appeared in the group of most strongly upregulated genes (Fig. 2E).  
 164 Further examination revealed that, among neurotransmitter biosynthesis enzymes, only *CHAT*  
 165 and dopamine  $\beta$  hydroxylase (*DBH*) were differentially expressed ( $\log_2(\text{FC}) = 2.1$  and  $\log_2(\text{FC}) =$   
 166  $-1.6$ , respectively, Fig. 3C). These two enzymes were also the only biosynthesis pathway  
 167 enzymes found to be related to the *HDAC2* inhibition. *DBH* and *HDAC2* expression correlated

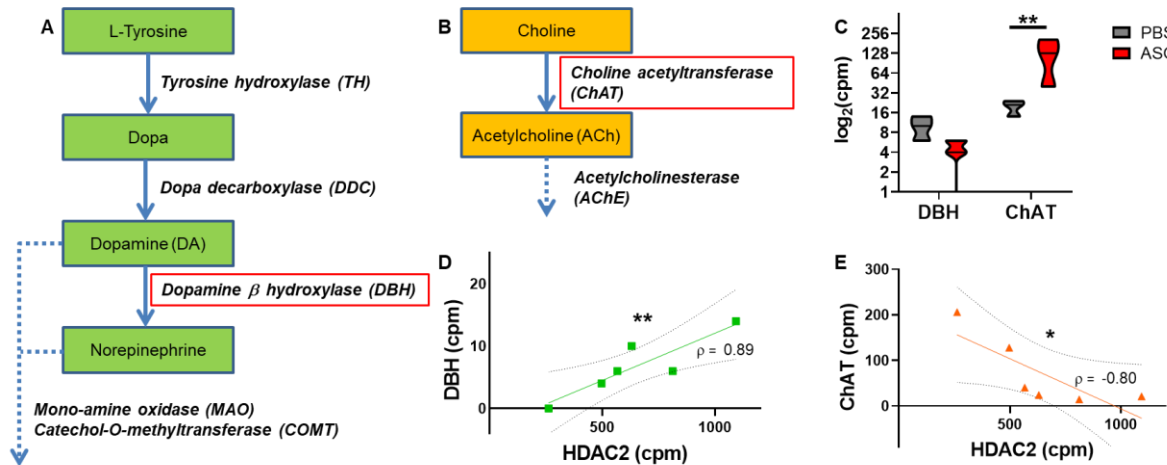

168

**Figure 3. Key neurotransmitter biosynthesis enzymes display altered expression after long-term *HDAC2* inhibition.** (A) Expression of dopamine beta hydroxylase (*DBH*), the gene that encodes the enzyme responsible for converting dopamine to norepinephrine was reduced in *HDAC2* ASO-injected rats, while (B) expression of choline acetyltransferase (*CHAT*), the gene that encodes the enzyme responsible for converting choline to acetylcholine, was increased. (C) The fold-change in *CHAT* expression was larger than the change in *DBH* expression. (D) However, the magnitude of the correlation between *DBH* and *HDAC2* counts per million (cpm) ( $\rho = 0.89$ ) was greater than (E) the magnitude of the inverse correlation between *CHAT* and *HDAC2* cpm ( $\rho = -0.80$ ). Curved lines show 95% confidence intervals. \*  $p < 0.05$ , \*\* $p < 0.01$ .

169 strongly ( $\rho = 0.89$ ,  $p = 0.02$ , Fig. 3C-D). Reduced *DBH* results in less conversion of DA to  
 170 norepinephrine (NE) during catecholamine biosynthesis (Fig. 3A). The lack of change in other  
 171 enzymes in the pathway indicates that it is likely that more DA (and less NE) was available in the  
 172 cortex of *HDAC2*-inhibited rats (Devoto et al., 2015). The increased expression of dopamine  
 173 receptors DRD1 and DRD2 further suggests that the increased DA may have had increased  
 174 interaction with postsynaptic neurons, thus potentially increasing the effects of DA on cognition  
 175 (Cameron et al., 2018).

176 Similarly, while *CHAT* expression was increased and correlated significantly with reduced *HDAC2*  
 177 ( $\rho = -0.8$ ,  $p = 0.05$ , Fig. 3E), Expression of acetylcholinesterase (*AChE*), the gene that encodes  
 178 the enzyme that catalyzes the breakdown of acetylcholine, was not significantly changed or  
 179 correlated, suggesting a pathway shift resulting in increased available acetylcholine in *HDAC2*-  
 180 inhibited rats (Fig. 3B). Taken together, these results indicate that *HDAC2* inhibition modulates

181 pathway enzyme transcription toward increased dopamine and acetylcholine, and decreased  
182 norepinephrine.

183 **HDAC2i increases transcripts associated with CREB-activation, neuronal synaptic activity**  
184 **and re-organization, cellular signaling and differentiation, and forebrain development**

185 Gene ontology analysis of the RNA-seq results identified significantly increased biological  
186 processes (Fig. 4), summarized here in 4 categories: CREB-activated transcription (Fig 4A),  
187 neuronal synaptic activity and organization (Fig. 4A-C), cellular signaling and differentiation (Fig.  
188 4B), and forebrain development (Fig. 4B). Fold-changes (FC) that have not been previously  
189 reported will be stated here as  $(\log_2(FC), p = p\text{-value})$ .

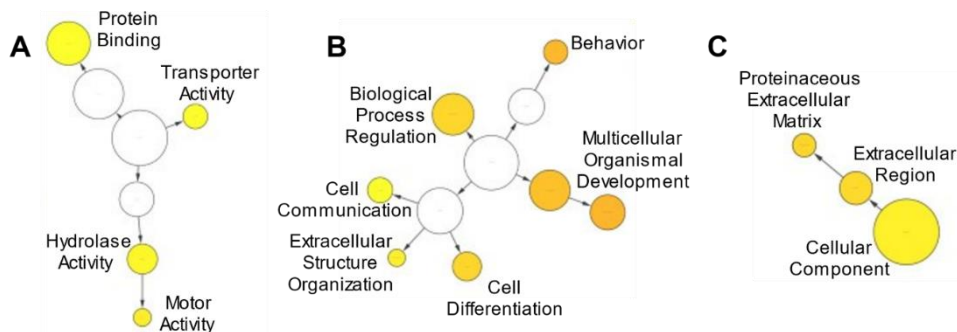

**Figure 4. Gene ontology (GO) analysis reveals upregulation of multiple biological process gene sets.** (A) Upregulated gene sets included HDAC/CREB-associated DNA-protein binding and hydrolase effector genes, along with CREB-associated genes known to facilitate motor activity, (B) cellular differentiation and communication genes related to developmental and behavioral changes, and (C) genes encoding synaptic and membrane-associated proteins that drive extracellular reorganization. Circle size indicates number of genes changed within the GO category. Circle color indicates the significance of the changes (**white** → **orange** corresponds to **least** → **most** significant).

190 *CREB-activated transcription.* The cAMP response element binding protein (CREB) is a nuclear  
191 transcription factor regulated by phosphorylation (Fig. 2C) via protein kinase A (PKA). PKA is, in  
192 turn, activated by cAMP (cAMP→PKA→CREB<sub>phosphorylation</sub>). Many of the upregulated DE  
193 genes, including most of the top DE genes, were found to be CREB-regulated. Several of these  
194 genes were related to G-protein coupled receptor (GPCR) signaling, many of which, in turn,  
195 regulate cAMP by modulating its catalyzing enzyme, adenylyl cyclase (AC). RNA-seq results  
196 confirmed that AC expression was upregulated (*ADCY5*, 1.0,  $p = 0.002$ ), revealing further

197 evidence that a positive feedback loop between CREB, GPCRs, and cAMP signaling led to the  
 198 strongly increased set of CREB-regulated Gs GPCR signaling transcripts. Examination of the top  
 199 DE genes (False Discovery Rate, FDR < 0.3) revealed that none are Gq GPCRs. This is  
 200 somewhat surprising since 1) the observed transcriptional changes suggest increased cholinergic  
 201 activity and 2) CNS muscarinic acetylcholine receptors act primarily through Gq signaling  
 202 (*CHRM1*). However, note that Gq associated intracellular signaling does not facilitate a positive  
 203 feedback loop involving cAMP/PKA since Gq GPCR effects are mediated by phospholipase C  
 204 (Fig. 5A). On the other hand, all four of the GPCRs in the top DE genes are adenylyl cyclase  
 205 linked (Gs/Gi). This evidence combined with the observed increases in AC and CREB binding  
 206 protein expression implicate Gs GPCRs as players in the putative GPCR → adenylyl cyclase →  
 207 cAMP → PKA → CREB positive feedback loop that amplified expression of Gs GPCRs (Fig. 5B).

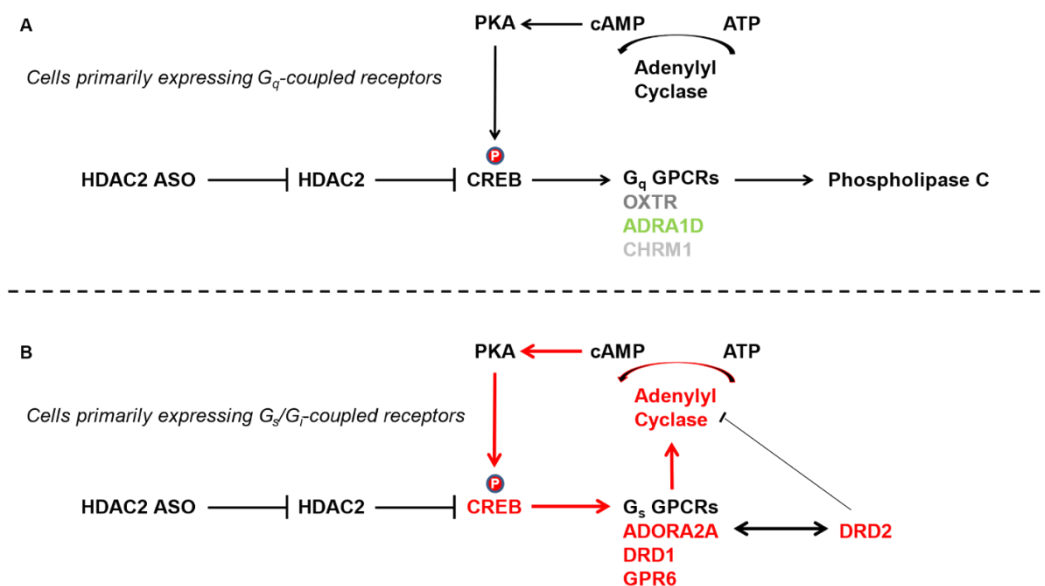

**Figure 5. Gs, but not Gq, GPCRs enable an HDAC2i-induced CREB / G-protein-signaling positive feedback loop.** (A) Gq receptors, expressed by genes such as *OXT*R (oxytocin receptor, log<sub>2</sub>(FC) = 1.1, p = 0.006), *ADRA1D* (adrenergic receptor, log<sub>2</sub>(FC) = -0.45, p = 0.05), and *CHRM1* (muscarinic acetylcholine receptor, unchanged) primarily act by upregulating phospholipase C. (B) Gs receptors, expressed by genes such as *ADORA2A* (adenosine receptor, log<sub>2</sub>(FC) = 4.0, p = 2.7e-6), *DRD1* (dopamine receptor, log<sub>2</sub>(FC) = 2.4, p = 3.8e-5), and *GPR6* (log<sub>2</sub>(FC) = 2.9, p = 0.0001) upregulate cyclic AMP (cAMP) by increasing adenylyl cyclase. cAMP, in turn, activates protein kinase A (PKA) which phosphorylates CREB, thus creating a positive feedback loop that further promotes CREB-regulated expression. Note that the expression of CREB-regulated Gs receptor genes were orders of magnitudes larger than those for CREB-regulated Gq receptor gene *OXT*R.

208 *Neuronal Synaptic Activity and Organization*. Top DE G-protein signaling genes related to  
209 synaptic activity and organization included Gs GPCRs *ADORA2A*, *DRD1*, *DRD2*, and *GPR6*  
210 (upregulates cAMP and promotes neurite outgrowth), along with *RGS9*, which expresses a  
211 protein that modulates G proteins by promoting their deactivation and regulates dopamine and  
212 opioid signaling in the brain (Rahman et al., 2003). Mice deficient in *RGS9* exhibit motor and  
213 cognitive difficulties (Blundell et al., 2008). These genes are all known to be CREB-regulated (Fig.  
214 2D-E). Other G-protein signaling-related DE genes included the gene that encodes Gq GPCR  
215 oxytocin receptor (*OXTR*,  $\log_2(\text{FC}) = 1.1$ ,  $p = 0.006$ , also CREB-regulated). Further top DE genes  
216 encode proteins important for synaptic activity and organization: *CHAT* (acetylcholine synthesis  
217 enzyme) and *SLC5A7* (aka *CHT*, choline transporter, CREB-regulated), *SYNDIG1L* (excitatory  
218 synapse regulator, Kalashnikova et al., 2010), *SLC35D3* (facilitates D1R emergence from  
219 endoplasmic reticulum, 1.7,  $p = 0.0006$ ), and *IQGAP3* (neuronal morphogenesis regulator).  
220 Additional DE genes encoding proteins important for synaptic activity and organization included  
221 genes that encode cation channel with high affinity for sodium, *ASIC4* (1.4,  $p = 0.0004$ ), calcium  
222 sensor / regulator of neurotransmitter release, synaptotagmin, *SYT9* (1.38,  $p = 0.0019$ ), synapse  
223 excitability regulating voltage-gated potassium channel, *KCNA5* (1.29,  $p = 0.0002$ , CREB-  
224 regulated), regulator of neurite outgrowth, *SLITRK6* (1.0,  $p = 0.006$ ), and vesicular proteins, *SV2C*  
225 (0.96,  $p = 0.00017$ ). These neuronal synaptic activity and organization expression changes,  
226 together with the shifts in neurotransmitter biosynthesis enzyme pathways, support increased  
227 dopaminergic (Fig. 6A-B) and cholinergic neuronal signaling (Fig. 6C-D). Note that, in the cortex,  
228 some terminals co-release dopamine and norepinephrine, and re-uptake of both occurs primarily  
229 through the norepinephrine transporter (NET). However, investigation revealed that neither  
230 dopamine transporter (*DAT*) or *NET* transcripts were significantly changed, suggesting increased  
231 dopamine in the synaptic cleft (Fig. 6B). Finally, although the identity of the affected post-synaptic  
232 neurons cannot be definitively determined from the data (nor the identity of potential additional  
233 pre-synaptic neurons, or neurons impacted by volume transmission), the large increase in

234 expression of *SYNDIG1L*, known to regulate excitatory synapses, suggests post-synaptic and/or  
 235 downstream involvement of glutamatergic neurons.

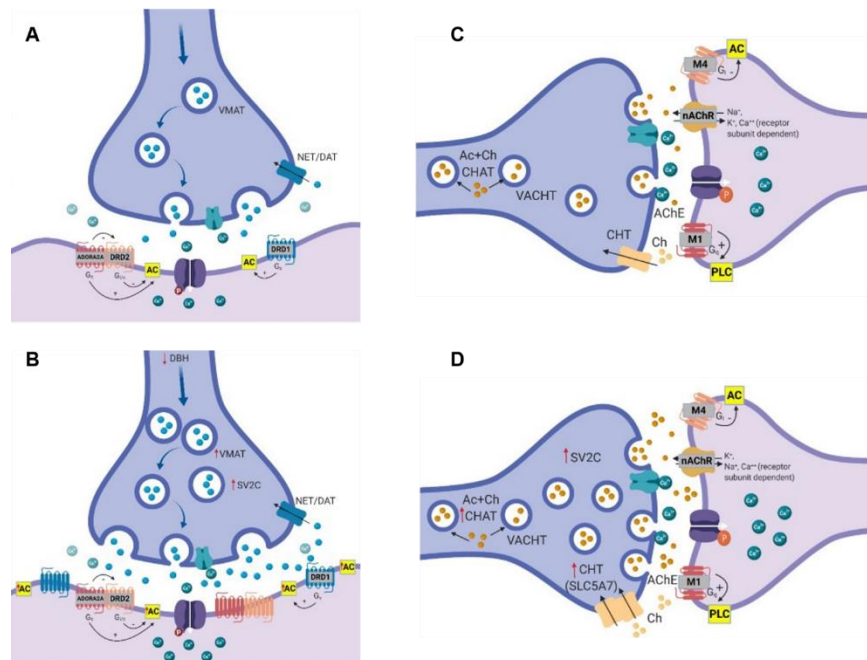

**Figure 6. Synaptic signaling gene expression is dramatically upregulated 1 month after *HDAC2* inhibition.** (A) Simplified diagram depicting putative pre- and post-synaptic neurons in control and (B) *HDAC2*-inhibited (*HDAC2i*) rats. *HDAC2i* induced changes favorable to dopamine (DA) biosynthesis (*DBH*) and increased vesicular packaging (*VMAT* and *SV2C*), as well as G protein-coupled receptor (GPCR) expression (*DRD1*, *DRD2*, *ADORA2A*). Increased cAMP signaling was implicated by upregulation of its synthesizing enzyme, adenylyl cyclase (*AC/ADCY*). (C) Cholinergic signaling indicated by differential gene expression in control and (D) *HDAC2i* rats pointed to increased acetylcholine production (*CHAT*), vesicular packaging (*SV2C*), and choline transporter uptake (*CHT/SLC5A7*). Increased synaptotagmin (*SYT9*, not pictured) further suggests increased neurotransmitter release in (B&D). Upregulated *AC* and GPCRs are indicated by increased icon numbers. Other genes with upregulated expression are indicated by red arrows in (B) and (D). FDR < 0.3

236 ***HDAC2* expression and broad transcriptome changes correlate with the total time spent**  
 237 **interacting with objects**

238 Surprisingly, despite increased novel object preference in the *HDAC2* ASO-injected rats, we did  
 239 not find correlations between novel object preference and expression of individual genes. Instead,  
 240 strong correlation was observed between the time spent exploring the objects and the  
 241 transcriptome changes (Supp. Fig. 1A). 882 genes, including *HDAC2*, correlated with object  
 242 interaction time after the initial day of testing (Behavior Days 3-4,  $||\rho|| \geq 0.7$ ,  $p < 0.05$ ).

243 Expression of neurotransmitter biosynthesis pathway enzyme genes *CHAT* and *DBH* (Fig. 3)  
244 correlated significantly with object interaction time (Supp. Fig. 1B-C). Intra-correlation analysis of  
245 the most increased DE genes (FDR < 0.3) that correlated with object exploration time ( $|\rho| \geq 0.7$ ,  
246  $p < 0.05$ ), and genes for associated synaptic proteins and enzymes that correlated strongly with  
247 object exploration time ( $|\rho| \geq 0.8$ ,  $p < 0.01$ ) revealed 4 gene clusters (Supp. Fig. 1D). The first  
248 cluster contained mainly CREB-regulated DE genes outside the top group of DE genes. The  
249 second group contained CREB binding protein (*CREBBP*) and *HDAC8*. The third cluster  
250 contained the top group of CREB-responsive GPCR genes (*ADORA2A*, *DRD1*, *DRD2*, and  
251 *GPR6*) along with adenylyl cyclase (*ADCY5*) and *CHAT*. The final group contained DE genes  
252 associated with cell differentiation (*RXRG*, *SIX3*, *CRABP1*) and synaptic organization. Other  
253 findings of interest include the high similarity in gene cross-correlation patterns for frequent  
254 heterodimer partners *DRD2* and *ADORA2A* (correlation between expression of *DRD2* and  
255 *ADORA2A* = 0.999,  $p = 1.5e-12$ ), the correlation of expression of pre-synaptic  $\alpha$  adrenergic Gi  
256 GPCRs with object interaction time (*ADRA2B*,  $\rho = 0.83$ ,  $p = 0.003$ ), and the observation that  
257 *HDAC8* expression correlated with object interaction time to the same degree as *HDAC2*  
258 expression, but in the opposite direction ( $|\rho| = 0.71$ ,  $p = 0.02$ , Supp. Fig. 1E-F), suggesting that  
259 *HDAC8*, a shorter class I HDAC with many sequence and structural similarities to *HDAC2*, may  
260 provide a compensatory regulatory mechanism like that previously observed between *HDAC1*  
261 and *HDAC2* (Wang et al., 2005, Cho and Cavalli, 2014).

262 **Significantly changed Gs and Gi, but not Gq, GPCR transcripts were upregulated and**  
263 **positively correlated with object interaction time**

264 Adenylyl cyclase linked Gs GPCRs *ADORA2A*, *DRD1*, *GPR6*, and Gi GPCR *DRD2* transcripts  
265 were strongly upregulated ( $\log_2(\text{FC}) > 2.4$ ,  $p < 0.0001$ , FDR < 0.3) and positively correlated with  
266 object interaction time ( $\rho \geq 0.8$ ,  $p < 0.01$ ) (Fig. 2D-E). Pre-synaptic Gi adrenoreceptors *ADRA2B*

267 and *ADRA2C* expression was also positively correlated with object interaction time ( $\rho \geq 0.8$ ,  $p <$   
268  $0.01$ ,  $\log_2(\text{FC}) \leq 0.3$ ,  $p \geq 0.06$ ).

## 269 **Discussion**

270 The findings in this study support a neurotransmitter modulation model that addresses  
271 unanswered questions regarding cortical mechanisms of *HDAC2* inhibition (*HDAC2i*)-enhanced  
272 cognition. We identified a select group of upregulated CREB-activated genes that modulate  
273 cortical synaptic plasticity, cellular differentiation, forebrain development, and neuronal  
274 adenosine, catecholamine, and acetylcholine pathways. Long-term *HDAC2i* directly modulated  
275 acetylcholine biosynthesis pathways through increased expression via simple CREB regulation,  
276 however, dopamine, norepinephrine, and adenosine pathways were modulated through a newly  
277 identified *HDAC2i*-induced CREB | Gs signaling positive feedback mechanism. The observed  
278 behavioral results of increased novelty preference, latency of enhanced cognition, and longer  
279 object exploration times are consistent with these neurotransmitter modulations.

### 280 **Activation of a select group of CREB-regulated genes**

281 Our findings are also consistent with literature suggesting that HDAC inhibitors enhance memory  
282 processes by activation of genes regulated by the CREB: CBP transcriptional complex (Korzus  
283 et al., 2004; Vecsey et al., 2007; Haettig et al., 2011). However, as we have found in previous  
284 studies, global stimulation can activate diverse sets of genes in the cortex compared to the  
285 hippocampus (Sanders et al., 2019). Indeed, there was no overlap between the set of previously  
286 reported DE CREB-regulated hippocampal genes and our DE CREB-regulated cortical genes.

### 287 **Positive feedback loop**

288 Both differential expression (Fig. 2D) and correlation evidence (positive behavioral correlation  
289 observed with Gs, but not Gq, GPCRs, Supplemental Fig. 1D) implicate adenylyl cyclase linked  
290 GPCRs as players in a GPCR  $\rightarrow$  adenylyl cyclase  $\rightarrow$  cAMP  $\rightarrow$  PKA  $\rightarrow$  CREB feedback loop.  
291 Cells with transcriptionally accessible adenylyl cyclase-linked receptors (and Gs > Gi) such as  
292 those with pre- or post-synaptic adenosine and/or dopamine receptors would enable this positive



293 feedback loop (Fig. 5B), while cells with transcriptionally repressed Gs GPCRs (potentially  
294 through cell-dependent DNA methylation patterns (Miller et al., 2008)) would not (Fig. 5A).

295 ***HDAC2* ASO-treated rats exhibit behavioral and transcriptional changes consistent with**  
296 **reduced norepinephrine, increased dopamine, and increased acetylcholine**

297 The overall findings in this study are consistent with literature linking increased cholinergic and  
298 dopaminergic activity with enhanced cognition (Blokland, 1995; Kaasinen and Rinne, 2002;  
299 Ballinger et al., 2016; Cameron et al., 2018). However, the surprising result that the injected rats  
300 performed no better than controls on the initial day of behavioral testing suggests that a more  
301 nuanced interpretation of the data is warranted.

302 Since norepinephrine release is also associated with cognitive performance (Berridge and  
303 Waterhouse, 2003; Sara, 2009; Chalermphanupap et al., 2013), this study's finding of decreased  
304 cortical expression of the enzyme responsible for norepinephrine synthesis from dopamine (DBH)  
305 implies that some aspects of cognition may have been diminished. Norepinephrine has been  
306 found to enhance processing of sensory inputs, arousal, and reaction speed. Thus, it is possible  
307 that reduced norepinephrine may be at least partially responsible for the observed delay in novelty  
308 preference performance (learning latency).

309 We did not find a linear relationship between the DE genes and individual performance on the  
310 behavioral task. However, we did find correlation between 882 DE genes and the time spent  
311 interacting with the objects after the initial test day. Novelty preference co-occurred with these  
312 longer object interaction times (despite no linear correlation). Since upregulated dopamine  
313 availability may increase behavioral rewards, longer object interaction times are likely attributable  
314 to its increase. A contributing effect from reduced norepinephrine is also supported by the  
315 correlation between object interaction time and both increased inhibitory pre-synaptic  $\alpha_2$ -  
316 adrenergic receptor transcripts and decreased post-synaptic  $\alpha_1$ -adrenergic receptor transcripts.

317 The specific cognitive effects of increased acetylcholine are more difficult to characterize in our  
318 study. However, previous studies suggest that increased acetylcholine may be responsible for  
319 cognition-enhancing synaptic plasticity and excitability changes (Rasmusson, 2000; Nakajima et  
320 al., 1986) like those observed in our study. Additionally, acetylcholine may have played a role in  
321 increased object interaction since *CHAT* correlated strongly with object interaction times. This is  
322 consistent with literature identifying acetylcholine as a driver of increased attention (Blokland et  
323 al., 1995; Ballinger et al., 2016; Hauser et al., 2019).

324 Taken together, the behavioral findings support the neurotransmitter modulation model implicated  
325 by the cortical RNA-seq results. However, although these findings support *HDAC2*'s ability to  
326 promote long-term cortical plasticity and enhanced cognition in rats, it is important to note that the  
327 observed cognitive improvements may coincide with potential negative effects such as increased  
328 learning latency in novel environments.

### 329 **Therapeutic relevance**

330 The findings in the current study support potential roles for *HDAC2* inhibition in treating disorders  
331 characterized by cognitive deficits including AD (Graff et al., 2012; Choubey and Jeyakanthan,  
332 2018) and some forms of autism (Kennedy et al. 2016). The evidence for upregulation of  
333 dopaminergic signaling found in this study suggests that *HDAC2* inhibition achieved through long-  
334 lasting *HDAC2* ASOs may also be beneficial for Parkinson's disease.

335 It is important to note that the data in this study reveal persistent cortical gene expression  
336 alterations produced by long-term *HDAC2* inhibition rather than potentially short-lived therapeutic  
337 effects. These persistent pathway modulations suggest new cognitive therapeutic targets such as  
338 *CHAT*, *DBH*, *VMAT2*, and *SV2C*. The *SV2* family of proteins has already been successfully  
339 targeted in epilepsy treatments to slow neurotransmitter release for patients with focal seizures  
340 (Wood et al., 2020), indicating an important role for vesicular packaging modulation in treatment  
341 of brain disorders. Our findings suggest that modulation of vesicular packaging may also be  
342 useful for promoting cognition-enhancing shifts in neurotransmitter release.

## 343 **Materials and Methods**

### 344 **Subjects**

345 18 adult male Sprague-Dawley rats (4-5 months old; 350 g  $\pm$  50 g) were used for this study. All  
346 procedures were performed with Vanderbilt University Institutional Animal Care and Use  
347 Committee (IACUC)-approved protocols and conducted in full compliance with the Association  
348 for Assessment and Accreditation of Laboratory Animal Care (AAALAC).

### 349 **Anti-sense oligonucleotides**

350 Hdac2-ASO1 (5'-CToCoAoCTTTTCGAGGTTCoCTA-3'), Hdac2-ASO2 (5'-  
351 AToGoCoAGTTTGAAGTCToGoGTC-3') and non-targeting ASO (NTA)  
352 (5'GToToToTCAAATACACCToToCAT-3') with phosphorothioate and 2' MOE modified ASO  
353 platforms were received from Ionis Pharmaceuticals.

### 354 **In vivo ASO administration**

355 Rats were anesthetized with 2% isoflurane and secured in a stereotaxic frame (David Kopf  
356 Instruments). *HDAC2* ASOs were administered to male Sprague-Dawley rats through unilateral  
357 intracerebroventricular (ICV) injection into the lateral ventricle (Bregma -0.92 mm A/P, -1.4 mm  
358 M/L, -3.4 mm D/V). ASOs were diluted to 80  $\mu\text{g}/\mu\text{l}$  in saline and injected 5 mg/kg into the lateral  
359 ventricle at a flow rate of 250 nL/minute. Controls were administered the same volume of either  
360 non-targeting ASOs (80  $\mu\text{g}/\mu\text{l}$  in saline) or 100% PBS. After the injection, the needle was kept in  
361 place for 5 min., followed by suturing of the incision.

### 362 **Novelty preference training and testing**

363 On Day 1, rats were introduced to the first object. On Day 2 and following, the object introduced  
364 on the previous day (familiar object) was placed in the same location and a new object was  
365 introduced (novel object). Rats were recorded for a 10 min test period, followed by a 30-minute  
366 familiarization (learning) period while interacting with the two objects (Sanders et al., 2019).

367 Learning was assessed by calculating the difference in the amount of time spent interacting with  
368 the novel object ( $t_{o2}$ ) compared to the learned object ( $t_{o1}$ ), expressed as a fraction of the total time  
369 spent interacting with the objects:

$$370 \quad \text{novel object preference} = \frac{t_{o2} - t_{o1}}{t_{o2} + t_{o1}}.$$

### 371 **Tissue collection**

372 Rats were decapitated within 45 minutes of the last behavioral session. Brains were removed and  
373 dissected into 15 sections, then flash-frozen for subsequent processing (Sanders et al., 2019).

### 374 **Western blots**

375 Tissue from the hippocampus and hippocampal-adjacent cortex were homogenized in RIPA  
376 buffer. Protein samples were run on 4-20% TGX Gels (Bio-Rad) and then transferred to PVDF  
377 membranes (Millipore) using standard protocols. Primary antibodies were: HDAC2 (Abcam  
378 ab12169) and actin (Abcam ab3280). Secondary antibodies were goat anti rat and goat anti rat  
379 (Abcam). Membranes were imaged on the LiCor Odyssey fluorescence imaging system.

### 380 **RNA extraction from tissue**

381 For rat tissue samples, total RNA was extracted from homogenized left hippocampus and  
382 hippocampal-adjacent cortical tissue (Fig. 2A) with AllPrep® DNA/RNA/miRNA kit (Qiagen). Total  
383 mRNA was reverse transcribed using the iScript cDNA Synthesis Kit (Bio-Rad). For culture  
384 samples the RNeasy plus kit (QIAGEN) and SuperScript VILO (Invitrogen) was used according  
385 to manufacturer's instructions. qPCR was performed with the CFX96 Optical Reaction Module  
386 (Bio-Rad) using SYBR green (Bio-Rad). Relative gene expression was determined using the  
387  $\Delta\Delta C_t$  method (Livak et al., 2010) and normalized to a housekeeping gene.

388

## 389 **Total RNA-seq**

390 Total RNA-seq libraries were prepared from homogenized left hippocampal-adjacent cortical  
391 tissue using the TruSeq Stranded Total RNA Library Prep Kit with Ribo-Zero Gold (Illumina)  
392 according to manufacturer's instructions. 1 µg of RNA was used as starting material and amplified  
393 with 12 PCR cycles. Library size distribution and quality were checked with an Agilent 2100  
394 Bioanalyzer and quantity was determined using qPCR. Samples were verified to have RIN ≥ 8.  
395 Libraries were sequenced on Illumina NextSeq instruments using a 75-cycle high throughput kit.

## 396 **Statistical analysis, annotation, and visualization**

397 Reads were aligned to the rn5 rat genome and transcriptome using Bowtie2 (Langmead et al.,  
398 2012). Differential expression tests were performed using featureCounts (Liao et al., 2014) and  
399 edgeR (Robinson et al., 2010) with standard settings. DAVID (Huang et al., 2009) was used for  
400 functional annotation of genes.

401 Normality was formally tested and verified where appropriate. Statistical significance was  
402 designated at  $p < 0.05$  for all analyses. Statistical significance was measured using two-sided  
403 unpaired t-tests. Adjusted p values were calculated using ANOVA multiple comparisons. FDRs  
404 were calculated using Benjamini and Hochberg False Discovery Rate correction.

405 Bioconductor was used to calculate the most significantly changed transcripts. Changes with  
406  $||\log_2(\text{fold-change})|| > 0.8$ , and  $\text{FDR} < 0.3$  were considered significant. These thresholds were  
407 selected to enable detection of changes close to, or greater than, the observed change in *HDAC2*  
408 mRNAs ( $||\log_2(\text{fold-change})|| = 0.9$ ,  $\text{FDR} = 0.28$ ). MATLAB (version R2017; The MathWorks) was  
409 used for correlation analysis. The Salk Institute CREB target gene database (Impey et al., 2004,  
410 Zhang et al., 2005) was used to identify *rattus norvegicus* genes with CRE binding domains in the  
411 promoter or known enhancers. In a few cases, human data were used to infer likely genes with  
412 CREB binding domains. These are indicated in the figures and text.

413 Gene ontology visualization was performed using Cytoscape (Shannon et al., 2003) with the  
414 BINGO plug-in (Maere et al., 2005). Heatmaps were generated with Graphpad Prism version 8  
415 (Graphpad software LLC) and Morpheus (<https://software.broadinstitute.org/morpheus>).

#### 416 **Acknowledgments**

417 *HDAC2* ASOs were provided by Ionis pharmaceuticals. Funding was provided by Vanderbilt  
418 Pharmacology Department Chair startup funds. Many thanks to Joe Weiss and Ben Coleman for  
419 assisting with the rat *HDAC2* ASO intracerebroventricular injections, to Joe Weiss and Casey  
420 Paton for assistance with lab work including dissections, Western Blot, and qPCR, to Haley Dotter  
421 for quantification of the *HDAC2* ASO-injected rat and control object interaction times, and to Katie  
422 Sanders for Bioinformatic graphics support. The author does not have financial or other  
423 relationships that constitute a conflict of interest.

424

#### 425 **Author Contributions**

426 T.H.S. designed the study and experiments. T.H.S. performed rat injections, behavioral  
427 experiments, and RNA-seq analysis. T.H.S. prepared the manuscript.

428

429

430

431 **References**

- 432 Alarcon JM, Malleret G, Touzani K, Vronskaya S, Ishii S, Kandel ER, Barco A (2004) Chromatin acetylation,  
433 memory, and LTP are impaired in CBP<sup>+/-</sup> mice: a model for the cognitive deficit in Rubinstein-Taybi  
434 syndrome and its amelioration. *Neuron* 42: 947-959.
- 435 Alter J, Lou F, Rabinowitz A, Yin H, Rosenfeld J, Wilton SD, Partridge TA, Lu QL (2006) Systemic delivery  
436 of morpholino oligonucleotide restores dystrophin expression bodywide and improves dystrophic  
437 pathology. *Nat. Med.* 12: 175-177.
- 438 Antunes M, Biala G (2012) The novel object recognition memory: neurobiology, test procedure, and its  
439 modifications. *Cogn Process* 13:93-110.
- 440 Aston-Jones G, Waterhouse B (2016) Locus coeruleus: from global projection system to adaptive regulation  
441 of behavior. *Brain research* 1645:75-78.
- 442 Ballinger EC, Ananth M, Talmage DA, Role LW (2016) Basal forebrain cholinergic circuits and signaling in  
443 cognition and cognitive decline. *Neuron* 91:1199-1218.
- 444 Berridge CW, Waterhouse BD (2003) The locus coeruleus–noradrenergic system: modulation of behavioral  
445 state and state-dependent cognitive processes. *Brain research reviews* 42:33-84.
- 446 Björklund A, Dunnett SB (2007) Dopamine neuron systems in the brain: an update. *Trends in neurosciences*  
447 30:194-202.
- 448 Blokland A (1995) Acetylcholine: a neurotransmitter for learning and memory? *Brain Research Reviews*  
449 21:285-300.
- 450 Blundell J, Hoang CV, Potts B, Gold SJ, Powell CM (2008) Motor coordination deficits in mice lacking  
451 RGS9. *Brain research* 1190:78-85.
- 452 Broadbent NJ, Gaskin S, Squire LR, Clark RE (2010) Object recognition memory and the rodent  
453 hippocampus. *Learning & memory* 17:5-11.
- 454 Cameron IG, Wallace DL, Al-Zughoul A, Kayser AS, D'Esposito M (2018) Effects of tolcapone and  
455 bromocriptine on cognitive stability and flexibility. *Psychopharmacology* 235:1295-1305.
- 456 Chalermphanupap T, Kinkead B, Hu WT, Kummer MP, Hammerschmidt T, Heneka MT, Weinschenker D,  
457 Levey AI (2013) Targeting norepinephrine in mild cognitive impairment and Alzheimer's disease.  
458 *Alzheimer's research & therapy* 5:21.

- 459 Chandler DJ, Gao W-J, Waterhouse BD (2014) Heterogeneous organization of the locus coeruleus  
460 projections to prefrontal and motor cortices. *Proceedings of the National Academy of Sciences*  
461 111:6816-6821.
- 462 Cho Y, Cavalli V (2014) HDAC signaling in neuronal development and axon regeneration. *Curr Opin*  
463 *Neurobiol* 27:118-126.
- 464 Choubey SK, Jeyakanthan J (2018) Molecular dynamics and quantum chemistry-based approaches to  
465 identify isoform selective HDAC2 inhibitor - a novel target to prevent Alzheimer's disease. *J.*  
466 *Recept. Signal Transduct. Res.* 38: 266-278.
- 467 Cools R, Barker RA, Sahakian BJ, Robbins TW (2001) Enhanced or impaired cognitive function in  
468 Parkinson's disease as a function of dopaminergic medication and task demands. *Cerebral cortex*  
469 11:1136-1143.
- 470 Cramer PE, Cirrito JR, Wesson DW, Lee CD, Karlo JC, Zinn AE, Casali BT, Restivo JL, Goebel WD, James  
471 MJ (2012) ApoE-directed therapeutics rapidly clear  $\beta$ -amyloid and reverse deficits in AD mouse  
472 models. *science* 335:1503-1506.
- 473 DeVos SL, Miller TM (2013) Antisense oligonucleotides: treating neurodegeneration at the level of RNA.  
474 *Neurotherapeutics* 10: 486-497.
- 475 Devoto P, Flore G, Saba P, Frau R, Gessa GL (2015) Selective inhibition of dopamine-beta-hydroxylase  
476 enhances dopamine release from noradrenergic terminals in the medial prefrontal cortex. *Brain*  
477 *and behavior* 5:e00393.
- 478 Downes M, Wei H (2006) Antisense oligonucleotide therapy for neurodegenerative disease. *J. Clin. Invest.*  
479 116: 2290-2296.
- 480 Gaskin S, Tardif M, Cole E, Piterkin P, Kayello L, Mumby DG (2010) Object familiarization and novel-object  
481 preference in rats. *Behavioural processes* 83:61-71.
- 482 Graff J, Rei D, Guan JS, Wang WY, Seo J, Hennig KM, Nieland TJ, Fass DM, Kao PF, Kahn M, Tsai LH  
483 (2012) An epigenetic blockade of cognitive functions in the neurodegenerating brain. *Nature* 483:  
484 222-226.



485 Guan JS, Haggarty SJ, Giacometti E, Dannenberg JH, Joseph N, Gao J, Nieland TJ, Zhou Y, Wang X,  
486 Mazitschek R, Bradner JE, DePinho RA, Jaenisch R, Tsai LH (2009) HDAC2 negatively regulates  
487 memory formation and synaptic plasticity. *Nature* 459:55-60.

488 Hack SP, Christie MJ (2003) Adaptations in adenosine signaling in drug dependence: therapeutic  
489 implications. *Critical Reviews™ in Neurobiology* 15.

490 Haettig J, Stefanko DP, Multani ML, Figueroa DX, McQuown SC, Wood MA (2011) HDAC inhibition  
491 modulates hippocampus-dependent long-term memory for object location in a CBP-dependent  
492 manner. *Learn Mem* 18:71-79.

493 Hardy J, Adolfsson R, Alafuzoff I, Bucht G, Marcusson J, Nyberg P, Per Dahl E, Wester P, Winblad B (1985)  
494 Transmitter deficits in Alzheimer's disease. *Neurochemistry International* 7:545-563.

495 Hauser TU, Eldar E, Purg N, Moutoussis M, Dolan RJ (2019) Distinct roles of dopamine and noradrenaline  
496 in incidental memory. *Journal of Neuroscience* 39:7715-7721.

497 Hawk JD, Florian C, Abel T (2011) Post-training intrahippocampal inhibition of class I histone deacetylases  
498 enhances long-term object-location memory. *Learn Mem.* 18: 367-370.

499 Huang W, Sherman BT, Lempicki RA (2009) Systematic and integrative analysis of large gene lists using  
500 DAVID bioinformatics resources. *Nat Protoc.* 4: 44-57.

501 Impey S, McCorkle SR, Cha-Molstad H, Dwyer JM, Yochum GS, Boss JM, McWeeney S, Dunn JJ, Mandel  
502 G, Goodman RH (2004) Defining the CREB regulon: a genome-wide analysis of transcription factor  
503 regulatory regions. *Cell* 119:1041-1054.

504 Itzhak Y, Liddie S, Anderson KL (2013) Sodium butyrate-induced histone acetylation strengthens the  
505 expression of cocaine-associated contextual memory. *Neurobiol Learn Mem* 102:34-42.

506 Jawerka M, Colak D, Dimou L, Spiller C, Lagger S, Montgomery RL, Olson EN, Wurst W, Gottlicher M,  
507 Gotz M (2010) The specific role of histone deacetylase 2 in adult neurogenesis. *Neuron Glia Biol*  
508 6:93-107.

509 Jeong Y, Leskow FC, El-Jaick K, Roessler E, Muenke M, Yocum A, Dubourg C, Li X, Geng X, Oliver G  
510 (2008) Regulation of a remote Shh forebrain enhancer by the Six3 homeoprotein. *Nature genetics*  
511 40:1348.

- 512 Kaasinen V, Rinne JO (2002) Functional imaging studies of dopamine system and cognition in normal aging  
513 and Parkinson's disease. *Neuroscience & Biobehavioral Reviews* 26:785-793.
- 514 Kalashnikova E, Lorca RA, Kaur I, Barisone GA, Li B, Ishimaru T, Trimmer JS, Mohapatra DP, Díaz E  
515 (2010) SynDIG1: an activity-regulated, AMPA-receptor-interacting transmembrane protein that  
516 regulates excitatory synapse development. *Neuron* 65(1):80-93.
- 517 Kordasiewicz HB, Stanek LM, Wancewicz EV, Mazur C, McAlonis MM, Pytel KA, Artates JW, Weiss A,  
518 Cheng SH, Shihabuddin LS (2012) Sustained therapeutic reversal of Huntington's disease by  
519 transient repression of huntingtin synthesis. *Neuron* 74:1031-1044.
- 520 Korzus E, Rosenfeld MG, Mayford M (2004) CBP histone acetyltransferase activity is a critical component  
521 of memory consolidation. *Neuron* 42: 961-972.
- 522 Lagutin OV, Zhu CC, Kobayashi D, Topczewski J, Shimamura K, Puellas L, Russell HR, McKinnon PJ,  
523 Solnica-Krezel L, Oliver G (2003) Six3 repression of Wnt signaling in the anterior neuroectoderm  
524 is essential for vertebrate forebrain development. *Genes & development* 17:368-379.
- 525 Langmead B, Salzberg SL (2012) Fast gapped-read alignment with Bowtie 2. *Nature methods* 9:357.
- 526 Levenson JM, O'Riordan KJ, Brown KD, Trinh MA, Molfese DL, Sweatt JD (2004) Regulation of histone  
527 acetylation during memory formation in the hippocampus. *J Biol Chem* 279:40545-40559.
- 528 Liao Y, Smyth GK, Shi W (2014) featureCounts: an efficient general-purpose program for assigning  
529 sequence reads to genomic features. *Bioinformatics* 30: 923-930. 42.
- 530 Livak KJ, Schmittgen TD. (2001) Analysis of relative gene expression data using real-time quantitative PCR  
531 and the 2<sup>-</sup>ΔΔCT method. *methods*. Dec 1;25(4):402-8.
- 532 Maere S, Heymans K, Kuiper M (2005) BiNGO: a Cytoscape plugin to assess overrepresentation of gene  
533 ontology categories in biological networks. *Bioinformatics* 21:16 (3448-9). Aug 15. PubMed ID:  
534 15972284.
- 535 Mattay VS, Fera F, Tessitore A, Hariri A, Das S, Callicott J, Weinberger D (2002) Neurophysiological  
536 correlates of age-related changes in human motor function. *Neurology* 58:630-635.
- 537 Meng L, Ward AJ, Chun S, Bennett CF, Beaudet AL, Rigo F (2015) Towards a therapy for Angelman  
538 syndrome by targeting a long non-coding RNA. *Nature* 518:409.

- 539 Merkhofer EC, Hu P, Johnson TL (2014) Introduction to cotranscriptional RNA splicing. In: Spliceosomal  
540 Pre-mRNA Splicing, pp 83-96: Springer.
- 541 Miller CA, Campbell SL, Sweatt JD (2008) DNA methylation and histone acetylation work in concert to  
542 regulate memory formation and synaptic plasticity. *Neurobiol Learn Mem* 89:599-603.
- 543 Morelli M, Di Paolo T, Wardas J, Calon F, Xiao D, Schwarzschild MA (2007) Role of adenosine A2A  
544 receptors in parkinsonian motor impairment and L-DOPA-induced motor complications. *Progress in*  
545 *neurobiology* 83:293-309.
- 546 Morris MJ, Mahgoub M, Na ES, Pranav H, Monteggia LM (2013) Loss of histone deacetylase 2 improves  
547 working memory and accelerates extinction learning. *J. Neurosci* 33: 6401-6411.
- 548 Mounier A, Georgiev D, Nam KN, Fitz NF, Castranio EL, Wolfe CM, Cronican AA, Schug J, Lefterov I,  
549 Koldamova R (2015) Bexarotene-activated retinoid X receptors regulate neuronal differentiation  
550 and dendritic complexity. *Journal of Neuroscience* 35:11862-11876.
- 551 Myhrer T (2003) Neurotransmitter systems involved in learning and memory in the rat: a meta-analysis  
552 based on studies of four behavioral tasks. *Brain Research Reviews* 41:268-287.
- 553 Nakajima Y, Nakajima S, Leonard RJ, Yamaguchi K (1986) Acetylcholine raises excitability by inhibiting  
554 the fast transient potassium current in cultured hippocampal neurons. *Proceedings of the National*  
555 *Academy of Sciences* 83:3022-3026.
- 556 Penney J, Tsai LH (2014) Histone deacetylases in memory and cognition. *Sci. Signal.* 7: re12.
- 557 Poplawski SG, Garbett KA, McMahan RL, Kordasiewicz HB, Zhao H, Kennedy AJ, Goleva SB, Sanders  
558 TH, Motley ST, Swayze EE, Sweatt JD (2020) An antisense oligonucleotide leads to suppressed  
559 transcriptional elongation of Hdac2 and long-term memory enhancement. *Molecular Therapy –*  
560 *Nucleic Acids*.
- 561 Pugazhenti S, Wang M, Pham S, Sze C-I, Eckman CB (2011) Downregulation of CREB expression in  
562 Alzheimer's brain and in A $\beta$ -treated rat hippocampal neurons. *Molecular neurodegeneration* 6:60.
- 563 Rahman Z, Schwarz J, Gold SJ, Zachariou V, Wein MN, Choi K-H, Koo A, Chen C-K, DiLeone RJ,  
564 Schwarz SC (2003) RGS9 modulates dopamine signaling in the basal ganglia. *Neuron* 38:941-952.
- 565 Rasmusson D (2000) The role of acetylcholine in cortical synaptic plasticity. *Behavioural brain research*  
566 115:205-218.

- 567 Robinson SE, Sohal VS (2017) Dopamine D2 Receptors Modulate Pyramidal Neurons in Mouse Medial  
568 Prefrontal Cortex through a Stimulatory G-Protein Pathway. *J Neurosci* 37:10063-10073.
- 569 Roosevelt RW, Smith DC, Clough RW, Jensen RA, Browning RA (2006) Increased extracellular  
570 concentrations of norepinephrine in cortex and hippocampus following vagus nerve stimulation in  
571 the rat. *Brain research* 1119:124-132.
- 572 Sanders TH, Weiss J, Hogewood L, Chen L, Paton C, McMahan RL, Sweatt JD (2019) Cognition-  
573 Enhancing Vagus Nerve Stimulation Alters the Epigenetic Landscape. *J Neurosci* 39:3454-3469.
- 574 Sara SJ (2009) The locus coeruleus and noradrenergic modulation of cognition. *Nature reviews*  
575 *neuroscience* 10:211.
- 576 Shannon P, Markiel A, Ozier O, Baliga NS, Wang JT, Ramage D, Amin N, Schwikowski B, Ideker T (2003)  
577 Cytoscape: a software environment for integrated models of biomolecular interaction networks.  
578 *Genome Res.* 13:11 (2498-504). Nov. PubMed ID: 14597658.
- 579 Silva AJ, Kogan JH, Frankland PW, Kida S (1998) CREB and memory. *Annual review of neuroscience*  
580 21:127-148.
- 581 Skerrett R, Malm T, Landreth G (2014) Nuclear receptors in neurodegenerative diseases. *Neurobiology of*  
582 *disease* 72:104-116.
- 583 Southwell AL, Skotte NH, Kordasiewicz HB, Østergaard ME, Watt AT, Carroll JB, Doty CN, Villanueva EB,  
584 Petoukhov E, Vaid K (2014) In vivo evaluation of candidate allele-specific mutant huntingtin gene  
585 silencing antisense oligonucleotides. *Molecular Therapy* 22:2093-2106.
- 586 Stein CA, Castanotto D (2017) FDA-Approved Oligonucleotide Therapies in 2017. *Mol. Ther.* 25: 1069-  
587 1075.
- 588 Vecsey CG, Hawk JD, Lattal KM, Stein JM, Fabian SA, Attner MA, Cabrera SM, McDonough CB, Brindle  
589 PK, Abel T, Wood MA (2007) Histone deacetylase inhibitors enhance memory and synaptic  
590 plasticity via CREB:CBP-dependent transcriptional activation. *J Neurosci* 27:6128-6140.
- 591 Verschuur CV, Suwijn SR, Boel JA, Post B, Bloem BR, van Hilten JJ, van Laar T, Tissingh G, Munts AG,  
592 Deuschl G (2019) Randomized delayed-start trial of levodopa in Parkinson's disease. *New England*  
593 *Journal of Medicine* 380:315-324.

594 Wang S, Watanabe T, Noritake J, Fukata M, Yoshimura T, Itoh N, Harada T, Nakagawa M, Matsuura Y,  
595 Arimura N (2007) IQGAP3, a novel effector of Rac1 and Cdc42, regulates neurite outgrowth. *J Cell*  
596 *Sci* 120:567-577.

597 Wang, DF, Helquist, P, Wiech, NL, Wiest, O (2005) Toward selective histone deacetylase inhibitor design:  
598 homology modeling, docking studies, and molecular dynamics simulations of human class I histone  
599 deacetylases. *J. Med. Chem.* 48(22), 6936-6947.

600 Wood MA, Kaplan MP, Park A, Blanchard EJ, Oliveira AM, Lombardi TL, Abel T (2005) Transgenic mice  
601 expressing a truncated form of CREB-binding protein (CBP) exhibit deficits in hippocampal synaptic  
602 plasticity and memory storage. *Learn Mem.* 12: 111-119.

603 Wood M, Daniels V, Provins L, Wolff C, Kaminski TM, Gillard M (2020) Pharmacological profile of the novel  
604 antiepileptic drug candidate Padsevonil: interactions with synaptic vesicle 2 proteins and the  
605 GABA<sub>A</sub> receptor. *Journal of Pharmacology and Experimental Therapeutics* 372(1):1-10.

606 Wu H, Sun H, Liang X, Lima WF, Crooke ST (2013) Human RNase H1 is associated with protein P32 and  
607 is involved in mitochondrial pre-rRNA processing. *PLoS One* 8:e71006.

608 Zentner GE, Henikoff S (2013) Regulation of nucleosome dynamics by histone modifications. *Nat Struct*  
609 *Mol Biol* 20:259-266.

610 Zhang X, Odom DT, Koo S-H, Conkright MD, Canettieri G, Best J, Chen H, Jenner R, Herbolsheimer E,  
611 Jacobsen E (2005) Genome-wide analysis of cAMP-response element binding protein occupancy,  
612 phosphorylation, and target gene activation in human tissues. *Proceedings of the National*  
613 *Academy of Sciences* 102:4459-4464. Korzus E, Rosenfeld MG, Mayford M. CBP histone  
614 acetyltransferase activity is a critical component of memory consolidation. *Neuron.* 2004; 42: 961 -  
615 972.

616

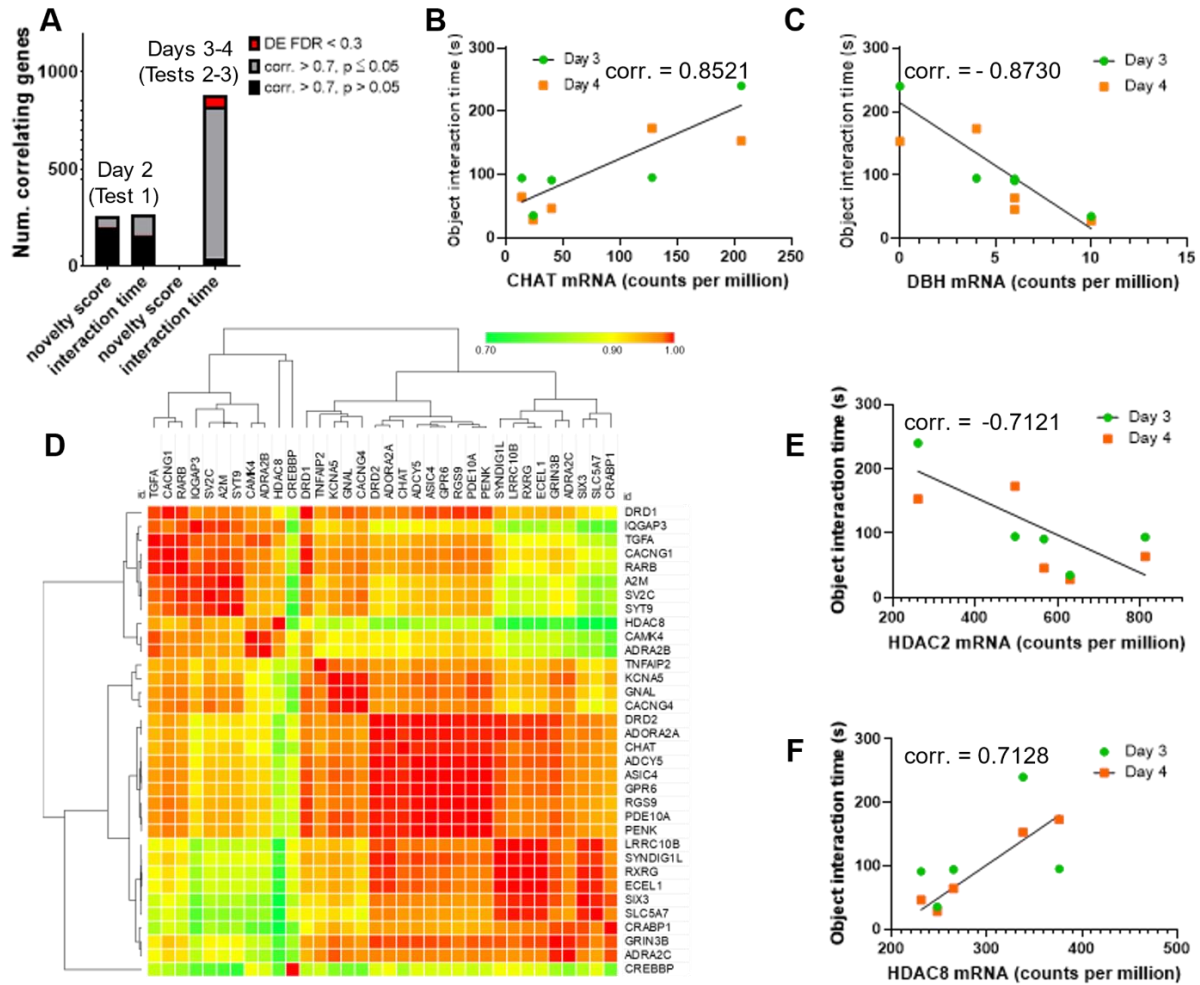

617

**Supplemental Figure 1. Expression of HDAC and biosynthesis enzyme genes correlated with object interaction time.** (A) On the first day of testing (Day 2), top differentially expressed (DE, FDR < 0.3) genes did not correlate with behavioral measures (novel object preference or object interaction time). However, 882 genes, including *HDAC2*, correlated with object interaction time on subsequent test days (Days 3 and 4). (B) Expression of neurotransmitter biosynthesis enzymes (Fig. 3), *CHAT* and (C) *DBH*, correlated significantly with object interaction time. (D) Intra-correlation analysis of the top DE genes that correlated with behavior revealed 4 clusters of genes: 1) CREB-regulated genes outside the top group of DE genes, 2) CREB binding protein (*CREBBP*) and *HDAC8*, 3) the top group of CREB-responsive GPCR genes (*ADORA2A*, *DRD1*, *DRD2*, and *GPR6*) along with adenylyl cyclase (*ADCY5*) and *CHAT*, and 4) DE genes associated with cell differentiation (*RXRG*, *SIX3*, *CRABP1*) and synaptic organization. (E) *HDAC2* expression correlated inversely with object interaction time. (F) *HDAC8* expression correlated to the same degree as *HDAC2*, but in the opposite direction.

618
